# Supplementary material
Source: PubMed Central journal article supplement (PMC6616015)

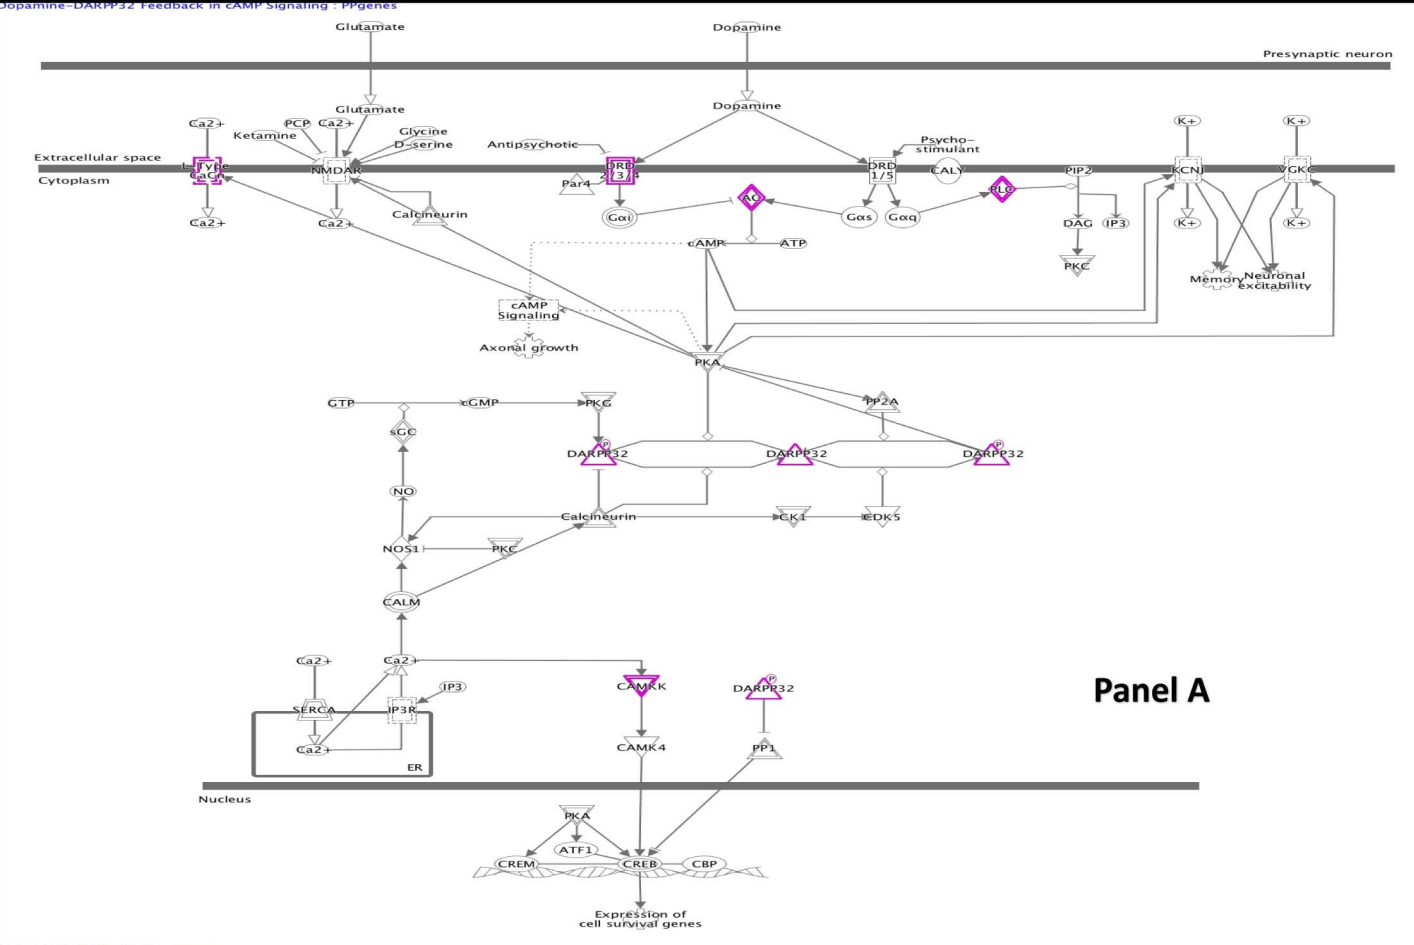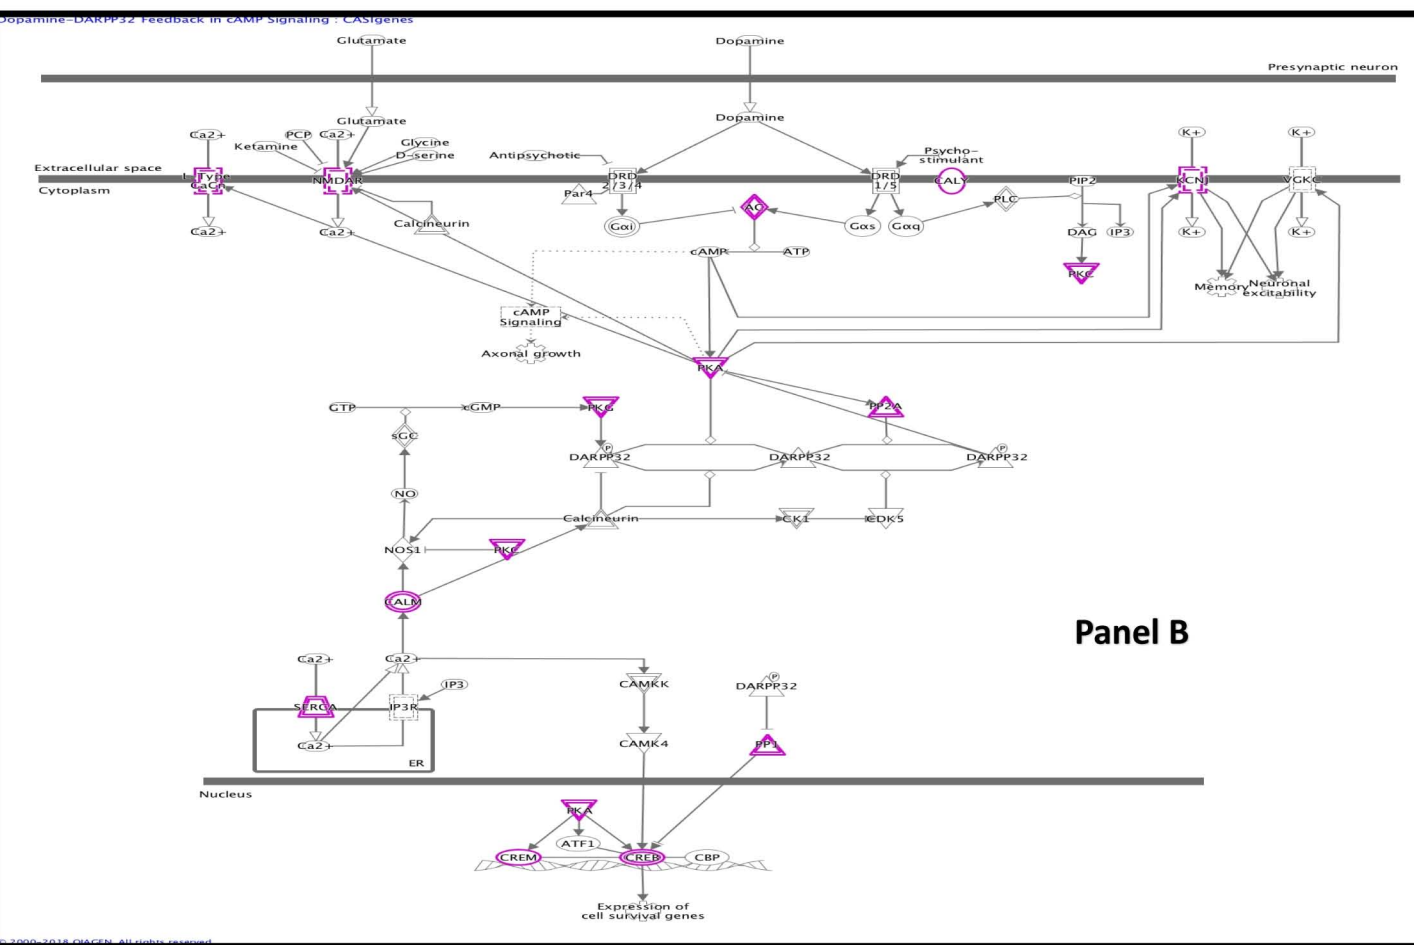

Supplement: NIHMS1518317-supplement-1.pdf [file NIHMS1518317-supplement-1.pdf]
